# Supplementary material for: Eye Degeneration and Loss of otx5b Expression in the Cavefish Sinocyclocheilus tileihornes
Source: PubMed Central journal article supplement (PMC6711879; doi:10.1007/s00239-019-09901-8), 2019-07-22
Supplement: 239_2019_9901_MOESM6_ESM.pdf [file 239_2019_9901_MOESM6_ESM.pdf]

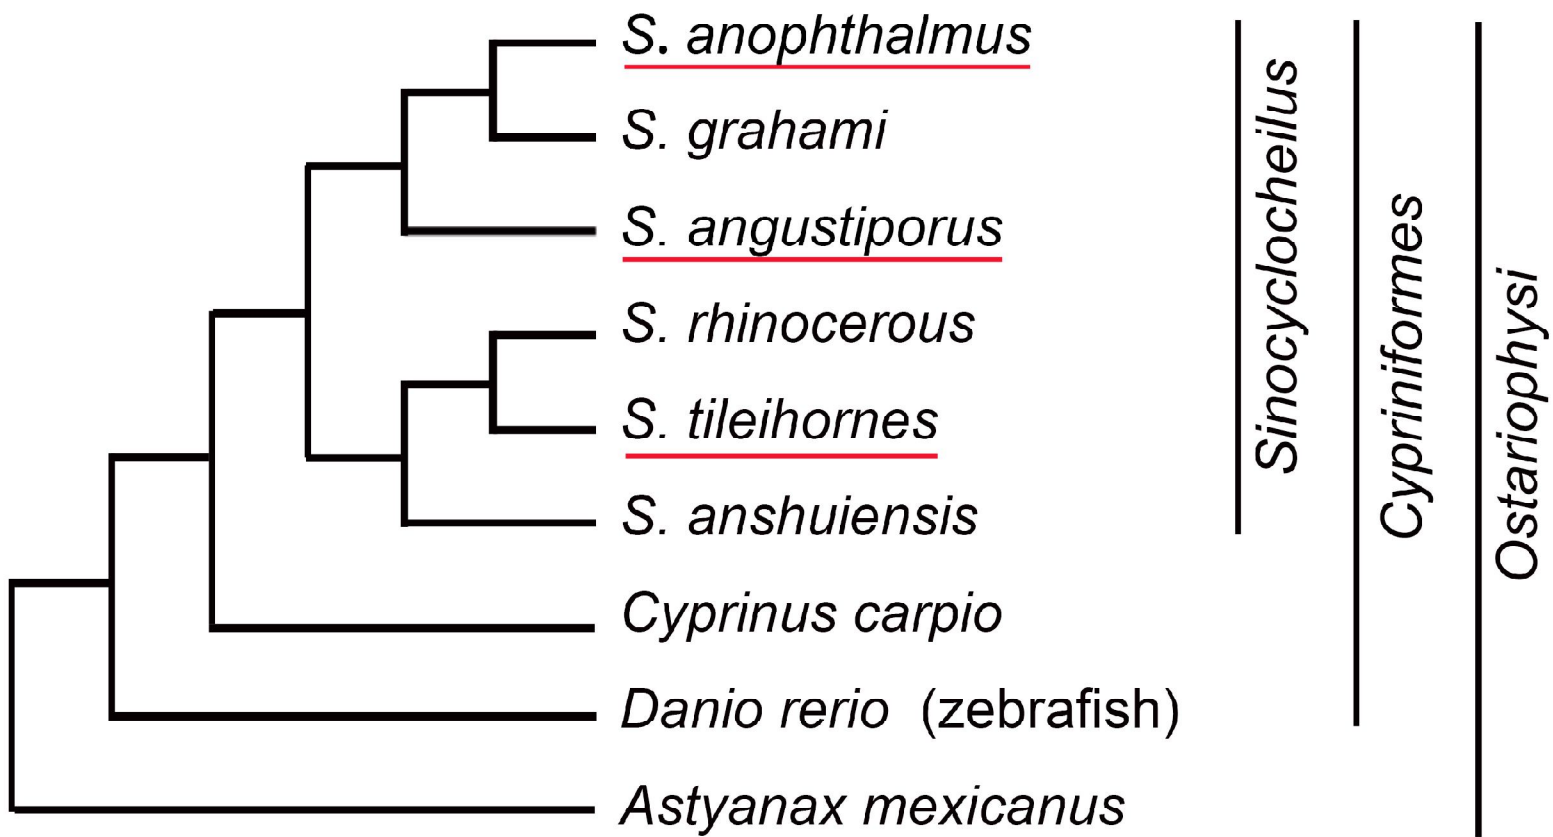

Fig. S1

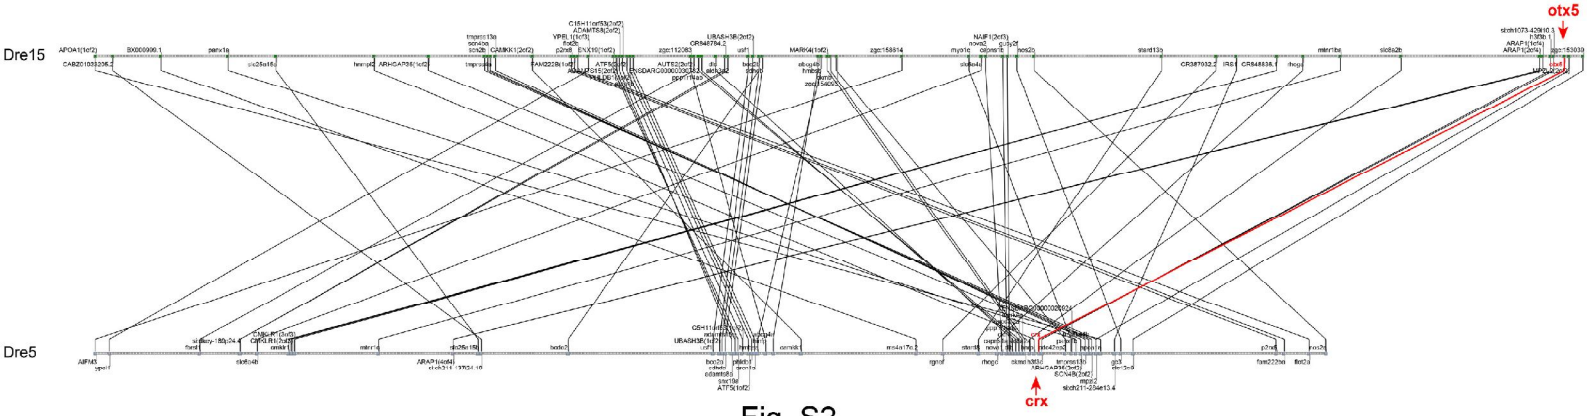

Fig. S2

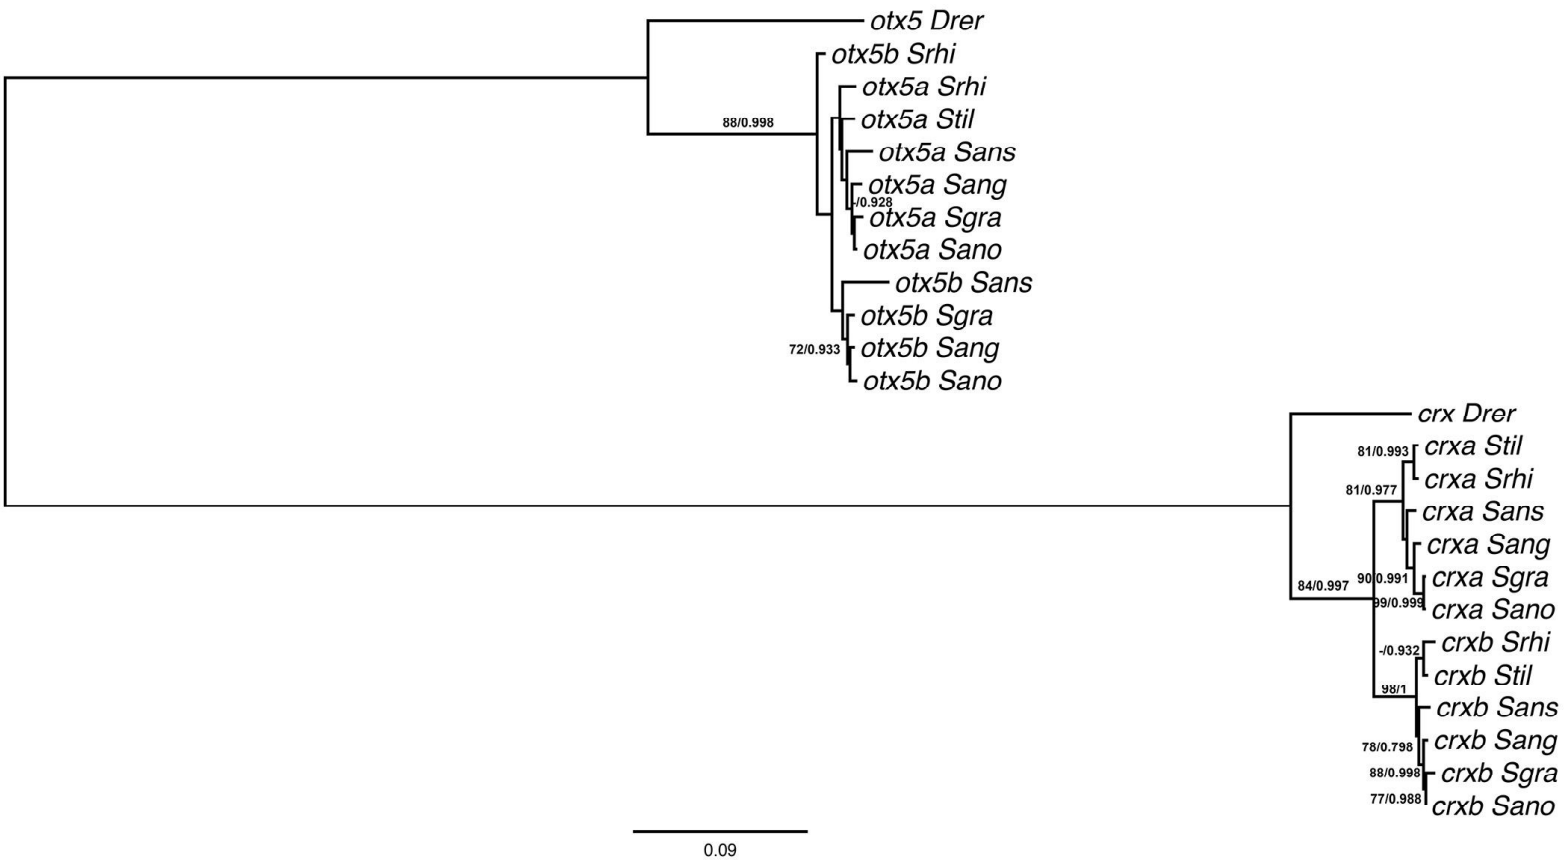

Fig. S3

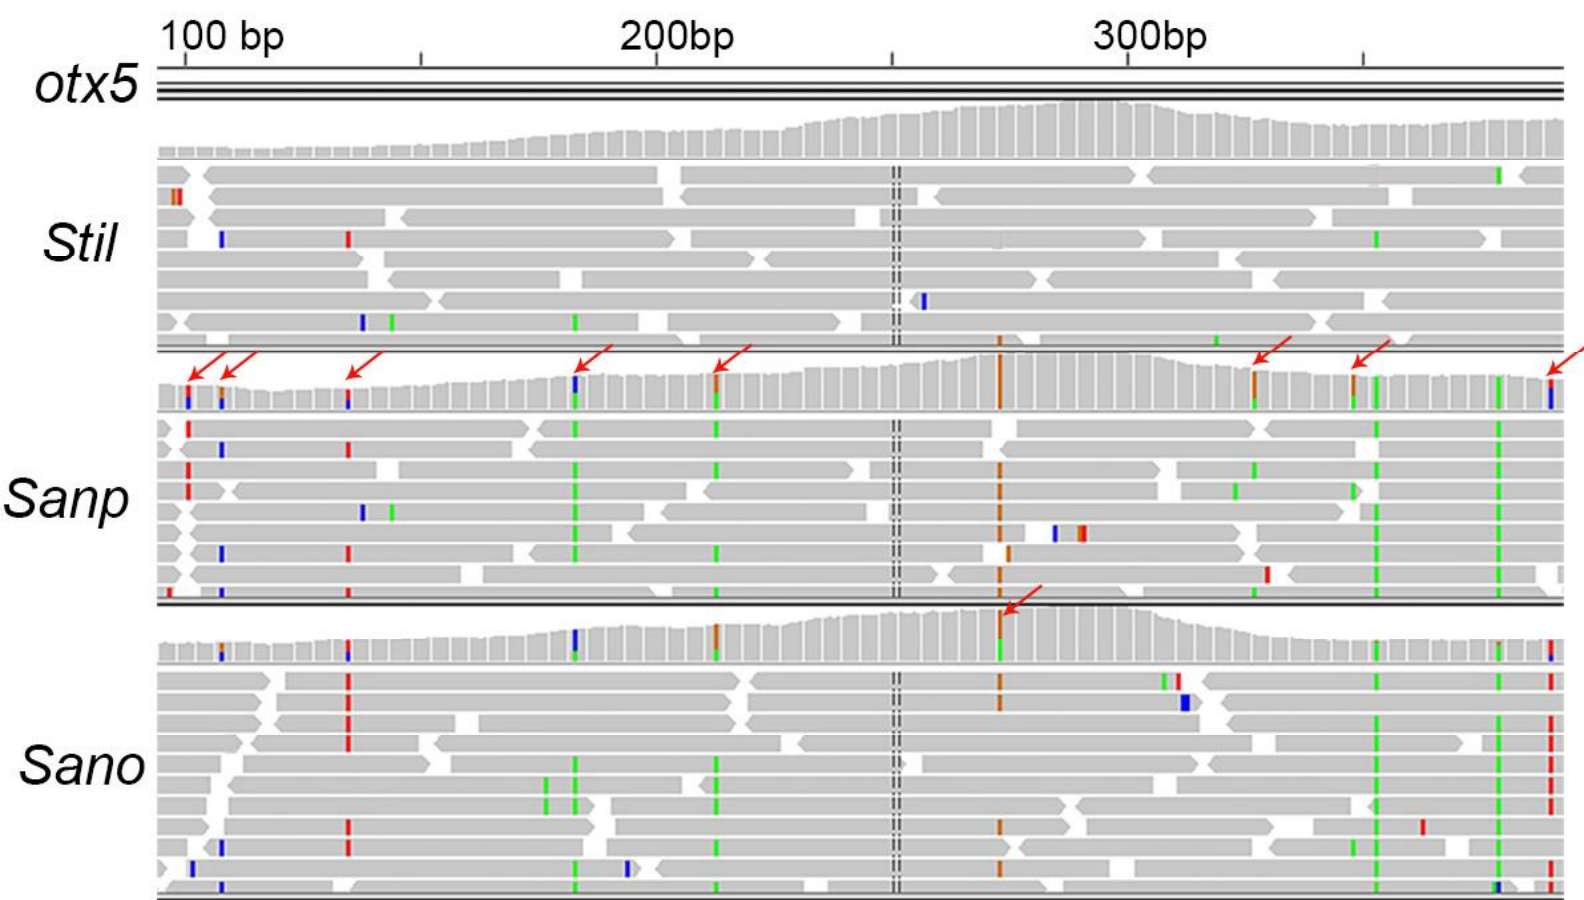

Fig. S4

|                   |                                                              |                                                              |                      |                                                              |                                                             |     |
|-------------------|--------------------------------------------------------------|--------------------------------------------------------------|----------------------|--------------------------------------------------------------|-------------------------------------------------------------|-----|
| <b>A</b>          | <i>otx5b-Sano</i>                                            | ATGATGTCTACATGAAGCAGCCTCATTACTCGGTGAACGGCTTGACTCTGTCGGTACC   | 60                   | <i>otx5b-Sano</i>                                            | CTTCAGGACCCGCTGTCGGTCTCCAGCAGCCCTGCCTGCAGCGCTCCAGCGCCTACCCC | 540 |
|                   | <i>otx5b-Sanp</i>                                            | ATGATGTCTACATGAAGCAGCCTCATTACTCGGTGAACGGCTTGACTCTGTCGGTACC   | 60                   | <i>otx5b-Sanp</i>                                            | CTTCAGGACCCGCTGTCGGTCTCCAGCAGCCCTGCCTGCAGCGCTCCAGCGCCTACCCC | 540 |
|                   | <i>otx5a-Stil</i>                                            | ATGATGTCTACATGAAGCAGCCTCATTACTCGGTGAACGGCTTGACTCTGTCGGTACC   | 60                   | <i>otx5a-Stil</i>                                            | CTTCAGGACCCGCTGTCGGTCTCCAGCAGCCCTGCCTGCAGCGCTCCAGCGCCTACCCC | 540 |
|                   | <i>otx5a-Sano</i>                                            | ATGATGTCTACATGAAGCAGCCTCATTACTCGGTGAACGGCTTGACTCTGTCGGTACC   | 60                   | <i>otx5a-Sano</i>                                            | CTTCAGGACCCGCTGTCGGTCTCCAGCAGCCCTGCCTGCAGCGCTCCAGCGCCTACCCC | 540 |
|                   | <i>otx5a-Sanp</i>                                            | ATGATGTCTACATGAAGCAGCCTCATTACTCGGTGAACGGCTTGACTCTGTCGGTACC   | 60                   | <i>otx5a-Sanp</i>                                            | CTTCAGGACCCGCTGTCGGTCTCCAGCAGCCCTGCCTGCAGCGCTCCAGCGCCTACCCC | 540 |
|                   |                                                              | *****                                                        |                      |                                                              | *****                                                       |     |
|                   | <i>otx5b-Sano</i>                                            | GGGATGGATCTCTGCACCTCCGCTGTCGGTTACCCCAACACTCCGCGCAAGCAGCGGCGC | 120                  | <i>otx5b-Sano</i>                                            | ATGACCTACACCCAGGCCCCGGCCTACGGGCAGAGCTACGCGCCCTCTCTGCTACTTTC | 600 |
|                   | <i>otx5b-Sanp</i>                                            | GGGATGGATCTCTGCACCTCCGCTGTCGGTTACCCCAACACTCCGCGCAAGCAGCGGCGC | 120                  | <i>otx5b-Sanp</i>                                            | ATGACCTACACCCAGGCCCCGGCCTACGGGCAGAGCTACGCTGCCTCTCTGCTACTTTC | 600 |
|                   | <i>otx5a-Stil</i>                                            | GGATGGATCTCTGCACCTCCGCTGTCGGTTACCCCAACACTCCGCGCAAGCAGCGGCGC  | 120                  | <i>otx5a-Stil</i>                                            | ATCACCTACAGCCAGGCCCCGGCCTACGGGCAGAGCTACGCGCCCTCTCTGCTACTTTC | 600 |
|                   | <i>otx5a-Sano</i>                                            | GGGATGGATCTCTGCACCTCCGCTGTCGGTTACCCCAACACTCCGCGCAAGCAGCGGCGC | 120                  | <i>otx5a-Sano</i>                                            | ATGACCTACACCCAGGCCCCGGCCTACGGGCAGAGCTACGCGCCCTCTCTGCTACTTTC | 600 |
| <i>otx5a-Sanp</i> | GGGATGGATCTCTGCACCTCCGCTGTCGGTTACCCCAACACTCCGCGCAAGCAGCGGCGC | 120                                                          | <i>otx5a-Sanp</i>    | ATGACCTACACCCAGGCCCCGGCCTACGGGCAGAGCTACGCGCCCTCTCTGCTACTTTC  | 600                                                         |     |
|                   | *****                                                        |                                                              |                      | *****                                                        |                                                             |     |
| <i>otx5b-Sano</i> | GAGAGAACCACCTTACGCGCGCGCAGCTCGACATCTCGAGTCACTGTTGCGCAAGACA   | 180                                                          | <i>otx5b-Sano</i>    | ACCGGGCTGGACTGCAGCTCGTATCTGTCCCCCATGCACCCGAGCTGTCGGCCACAGGG  | 660                                                         |     |
| <i>otx5b-Sanp</i> | GAGAGAACCACCTTACGCGCGCGCAGCTCGACATCTCGAGTCACTGTTGCGCAAGACA   | 180                                                          | <i>otx5b-Sanp</i>    | ACCGGGCTGGACTGCAGCTCGTATCTGTCCCCCATGCACCCGAGCTGTCGGCCACAGGG  | 660                                                         |     |
| <i>otx5a-Stil</i> | GAGAGAACCACCTTACGCGCGCGCAGCTCGACATCTCGAGTCACTGTTGCGCAAGACA   | 180                                                          | <i>otx5a-Stil</i>    | ACCGGGCTGGACTGCAGCTCGTATCTGTCCCCCATGCACCCGAGCTGTCGGCCACAGGG  | 660                                                         |     |
| <i>otx5a-Sano</i> | GAGAGAACCACCTTACGCGCGCGCAGCTCGACATCTCGAGTCACTGTTGCGCAAGACA   | 180                                                          | <i>otx5a-Sano</i>    | ACCGGGCTGGACTGCAGCTCGTATCTGTCCCCCATGCACCCGAGCTGTCGGCCACAGGG  | 660                                                         |     |
| <i>otx5a-Sanp</i> | GAGAGAACCACCTTACGCGCGCGCAGCTCGACATCTCGAGTCACTGTTGCGCAAGACA   | 180                                                          | <i>otx5a-Sanp</i>    | ACCGGGCTGGACTGCAGCTCGTATCTGTCCCCCATGCACCCGAGCTGTCGGCCACAGGG  | 660                                                         |     |
|                   | *****                                                        |                                                              |                      | *****                                                        |                                                             |     |
| <i>otx5b-Sano</i> | CGATACCCAGACATCTTCATGAGAGAGGACGTAGCTCTCAAGATCAACCTGCCCGAGTCC | 240                                                          | <i>otx5b-Sano</i>    | GGCGCTCTCAGCCCATGGGTGCAGCGCTCAGCCAGTCCGCCGCTCGCTCTCGTCGCAG   | 720                                                         |     |
| <i>otx5b-Sanp</i> | CGATACCCAGACATCTTCATGAGAGAGGACGTAGCTCTCAAGATCAACCTGCCCGAGTCC | 240                                                          | <i>otx5b-Sanp</i>    | GGCGCTCTCAGCCCATGGGTGCAGCGCTCAGCCAGTCCGCCGCTCGCTCTCGTCGCAG   | 720                                                         |     |
| <i>otx5a-Stil</i> | CGCTACCCAGACATCTTCATGAGAGAGGACGTGGCTCTCAAGATCAACCTGCCCGAGTCC | 240                                                          | <i>otx5a-Stil</i>    | CGCCCTCTCAGCCCATGGGTGCACCCCTCAGCCAGTCCGCCGCTCGCTCTCGTCGCAG   | 720                                                         |     |
| <i>otx5a-Sano</i> | CGCTACCCAGACATCTTCATGAGAGAGGACGTGGCTCTCAAGATCAACCTGCCCGAGTCC | 240                                                          | <i>otx5a-Sano</i>    | GGCGCTCTCAGCCCATGGGTGCAGCGCTCAGCCAGTCCGCCGCTCGCTCTCGTCGCAG   | 720                                                         |     |
| <i>otx5a-Sanp</i> | CGCTACCCAGACATCTTCATGAGAGAGGACGTGGCTCTCAAGATCAACCTGCCCGAGTCC | 240                                                          | <i>otx5a-Sanp</i>    | GGCGCTCTCAGCCCATGGGTGCAGCGCTCAGCCAGTCCGCCGCTCGCTCTCGTCGCAG   | 720                                                         |     |
|                   | *****                                                        |                                                              |                      | *****                                                        |                                                             |     |
| <i>otx5b-Sano</i> | AGAGTCCAGGTGTGGTTAAGAACCCTCGTGCAAGTGCCTCAACAGCAGCAGCAACAG    | 300                                                          | <i>otx5b-Sano</i>    | GGCTACACGGCCGCTTTCGCTGGGCTTCGGCGCCATCGACTGCTTAGACTACAAGACCAA | 780                                                         |     |
| <i>otx5b-Sanp</i> | AGAGTCCAGGTGTGGTTAAGAACCCTCGTGCAAGTGCCTCAACAGCAGCAGCAACAG    | 300                                                          | <i>otx5b-Sanp</i>    | GGCTACACGGCCGCTTTCGCTGGGCTTCGGCGCCATCGACTGCTTAGACTACAAGACCAA | 780                                                         |     |
| <i>otx5a-Stil</i> | AGAGTCCAGGTGTGGTTAAGAACCCTCGTGCAAGTGCCTCAACAGCAGCAGCAACAG    | 300                                                          | <i>otx5a-Stil</i>    | GGCTACACGGCCGCTTTCGCTGGGCTTCGGCGCCATCGACTGCTTAGACTACAAGACCAA | 780                                                         |     |
| <i>otx5a-Sano</i> | AGAGTCCAGGTGTGGTTAAGAACCCTCGTGCAAGTGCCTCAACAGCAGCAGCAACAG    | 300                                                          | <i>otx5a-Sano</i>    | GGCTACACGGCCGCTTTCGCTGGGCTTCGGCGCCATCGACTGCTTAGACTACAAGACCAA | 780                                                         |     |
| <i>otx5a-Sanp</i> | AGAGTCCAGGTGTGGTTAAGAACCCTCGTGCAAGTGCCTCAACAGCAGCAGCAACAG    | 300                                                          | <i>otx5a-Sanp</i>    | GGCTACACGGCCGCTTTCGCTGGGCTTCGGCGCCATCGACTGCTTAGACTACAAGACCAA | 780                                                         |     |
|                   | *****                                                        |                                                              |                      | *****                                                        |                                                             |     |
|                   | <i>otx5-F</i>                                                |                                                              |                      |                                                              |                                                             |     |
| <i>otx5b-Sano</i> | ACCAGCGCCAGACCAAAACCAGACCCGCGAAGAAGAAGTCTCGGCCCAAGAGCCC      | 360                                                          | <i>otx5b-Sano</i>    | ACGGC---CTGGAAGCTCAACTTCAACGCTGCGGACTGCCTGGACTACAAGACCAGAAC  | 837                                                         |     |
| <i>otx5b-Sanp</i> | ACCAGCGCCAGACCAAAACCAGACCCGCGAAGAAGAAGTCTCGGCCCAAGAGCCC      | 360                                                          | <i>otx5b-Sanp</i>    | ACGGC---CTGGAAGCTCAACTTCAACGCTGCGGACTGCCTGGACTACAAGACCAGAAC  | 837                                                         |     |
| <i>otx5a-Stil</i> | ACCAGCGCCAGACCAAAACCAGACCCGCGAAGAAGAAGTCTCGGCCCAAGAGCCC      | 360                                                          | <i>otx5a-Stil</i>    | ACGGCCTCTGGAAGCTCAACTTCAACGCTGCGGACTGCCTGGACTACAAGACCAGAAC   | 840                                                         |     |
| <i>otx5a-Sano</i> | ACCAGCGCCAGACCAAAACCAGACCCGCGAAGAAGAAGTCTCGGCCCAAGAGCCC      | 360                                                          | <i>otx5a-Sano</i>    | ACGGCCTCTGGAAGCTCAACTTCAACGCTGCGGACTGCCTGGACTACAAGACCAGAAC   | 840                                                         |     |
| <i>otx5a-Sanp</i> | ACCAGCGCCAGACCAAAACCAGACCCGCGAAGAAGAAGTCTCGGCCCAAGAGCCC      | 360                                                          | <i>otx5a-Sanp</i>    | ACGGCCTCTGGAAGCTCAACTTCAACGCTGCGGACTGCCTGGACTACAAGACCAGAAC   | 840                                                         |     |
|                   | *****                                                        |                                                              |                      | *****                                                        |                                                             |     |
| <i>otx5b-Sano</i> | AGCGTCAGCGAGCCAGCACCAGCACCACCAATGGCCCTACAGCCCTCCGCTCTCCGGCC  | 420                                                          | <i>otx5b-Sano</i>    | TCCTGGAAGTTCAGGTCCTGTAG                                      | 861                                                         |     |
| <i>otx5b-Sanp</i> | AGCGTCAGCGAGCCAGCACCAGCACCACCAATGGCCCTACAGCCCTCCGCTCTCCGGCC  | 420                                                          | <i>otx5b-Sanp</i>    | TCCTGGAAGTTCAGGTCCTGTAG                                      | 861                                                         |     |
| <i>otx5a-Stil</i> | AGCGTCAGCGAGCCAGCACCAGCACCACCAATGGCCCTACAGCCCTCCGCTCTCCGGCC  | 420                                                          | <i>otx5a-Stil</i>    | TCCTGGAAGTTCAGGTCCTGTAG                                      | 864                                                         |     |
| <i>otx5a-Sano</i> | AGCGTCAGCGAGCCAGCACCAGCACCACCAATGGCCCTACAGCCCTCCGCTCTCCGGCC  | 420                                                          | <i>otx5a-Sano</i>    | TCCTGGAAGTTCAGGTCCTGTAG                                      | 864                                                         |     |
| <i>otx5a-Sanp</i> | AGCGTCAGCGAGCCAGCACCAGCACCACCAATGGCCCTACAGCCCTCCGCTCTCCGGCC  | 420                                                          | <i>otx5a-Sanp</i>    | TCCTGGAAGTTCAGGTCCTGTAG                                      | 864                                                         |     |
|                   | *****                                                        |                                                              |                      | *****                                                        |                                                             |     |
| <i>otx5b-Sano</i> | CCGAGCTCCAGCTCCACCAGCGCCACCGTGTCCATCTGGAGCCGGCCCTCCATCTCTCCG | 480                                                          | <i>otx5-R</i>        |                                                              |                                                             |     |
| <i>otx5b-Sanp</i> | CCGAGCTCCAGCTCCACCAGCGCCACCGTGTCCATCTGGAGCCGGCCCTCCATCTCTCCG | 480                                                          | <i>otx5b-mRNA</i>    | ACGGC---CTGGAAG                                              |                                                             |     |
| <i>otx5a-Stil</i> | CCGAGCTCCAGCTCCACCAGCGCCACCGTGTCCATCTGGAGCCGGCCCTCCATCTCTCCG | 480                                                          | <i>otx5b-protein</i> | T A W K                                                      |                                                             |     |
| <i>otx5a-Sano</i> | CCGAGCTCCAGCTCCACCAGCGCCACCGTGTCCATCTGGAGCCGGCCCTCCATCTCTCCG | 480                                                          |                      | I I I I                                                      |                                                             |     |
| <i>otx5a-Sanp</i> | CCGAGCTCCAGCTCCACCAGCGCCACCGTGTCCATCTGGAGCCGGCCCTCCATCTCTCCG | 480                                                          | <i>otx5a-protein</i> | T A S W K                                                    |                                                             |     |
|                   | *****                                                        |                                                              | <i>otx5a-mRNA</i>    | ACGGCCTCTGGAAG                                               |                                                             |     |

Fig. S5
